# Supplementary material for: COVID-19: opacification score is higher in the right lung and right lung involvement is a better predictor of ICU admission
Source: PubMed Central journal article supplement — Eur Respir J. 2020 Dec 10;56(6):2002340. doi: 10.1183/13993003.02340-2020 (PMC7530909; doi:10.1183/13993003.02340-2020), 2020-12-10
Supplement: ERJ-02340-2020.Shareable.pdf [file ERJ-02340-2020.Shareable.pdf]

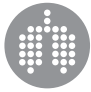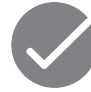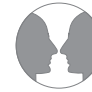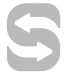

SHAREABLE PDF

# COVID-19: opacification score is higher in the right lung and right lung involvement is a better predictor of ICU admission

Deepak Nagra<sup>1</sup>, Mark Russell<sup>1</sup>, Mark Yates<sup>2</sup>, James Galloway<sup>2</sup>, Richard Barker<sup>3</sup>, Sujal R. Desai<sup>4</sup> and Sam Norton<sup>5</sup>

**Affiliations:** <sup>1</sup>King's College Hospital, London, UK. <sup>2</sup>King's College London, Centre for Rheumatic Disease, London, UK. <sup>3</sup>King's College Hospital, Respiratory Medicine, London, UK. <sup>4</sup>The Royal Brompton and Harefield NHS Foundation Trust, Radiology, London, UK. <sup>5</sup>King's College London, London, UK.

**Correspondence:** Deepak Nagra, King's College Hospital, Dept of Rheumatology, Portacabin B, London SE5 9RS, UK. E-mail: deepak.nagra@nhs.net

 @ERSpublications

**In COVID-19 the right lung has higher degree of opacification on plain radiograph than the left lung. Right lung opacification is a stronger predictor for critical care admission and death.** <https://bit.ly/36dig2N>

**Cite this article as:** Nagra D, Russell M, Yates M, *et al.* COVID-19: opacification score is higher in the right lung and right lung involvement is a better predictor of ICU admission. *Eur Respir J* 2020; 56: 2002340 [<https://doi.org/10.1183/13993003.02340-2020>].

This single-page version can be shared freely online.

*To the Editor:*

The global response to coronavirus disease 2019 (COVID-19) has resulted in a wealth of research. The accrual of data through electronic health records (EHR) facilitates the efficient interrogation of datasets. Indeed, many issues of relevance to the COVID-19 response have been explored in this way, the impact of ethnicity or angiotensin-converting enzyme inhibition on outcomes, to name but two [1, 2].
